# Supplementary material
Source: Springer Nature journal article supplement (https://www.springermedizin.de/resource/supplementary/12913_2005_176_MOESM1_ESM.pdf/9534374)
Supplement: MOESM1 [file 9534374]

## INPUTS

1. Technical staff  
(vaccinator, community health nurse, emergency and humanitarian officer, maternal and child health aide)
2. Sub-ordinate staff  
(TBA, porter, watchman)
3. Materials & supplies
4. Capital inputs

## PROCESS

**PHU  
Services**



## OUTPUTS

1. Antenatal + post natal care
2. Babies delivered
3. Nutrition/growth monitoring visits
4. Family planning visits
5. Under 5's immunized + pregnant women immunized
6. Health education
